# Supplementary material for: Impact of exhaust emissions on chemical snowpack composition at Concordia Station, Antarctica
Source: Copernicus journal article supplement (doi:10.5194/tc-14-199-2020), 2020-01-23
Supplement: Supplementary file 1 [file tc-14-199-2020-supplement.pdf]

Supplement of The Cryosphere, 14, 199–209, 2020  
<https://doi.org/10.5194/tc-14-199-2020-supplement>  
© Author(s) 2020. This work is distributed under  
the Creative Commons Attribution 4.0 License.

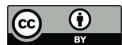

*Supplement of*

## **Impact of exhaust emissions on chemical snowpack composition at Concordia Station, Antarctica**

**Detlev Helmig et al.**

*Correspondence to:* Detlev Helmig ([detlev.helmig@colorado.edu](mailto:detlev.helmig@colorado.edu))

The copyright of individual parts of the supplement might differ from the CC BY 4.0 License.

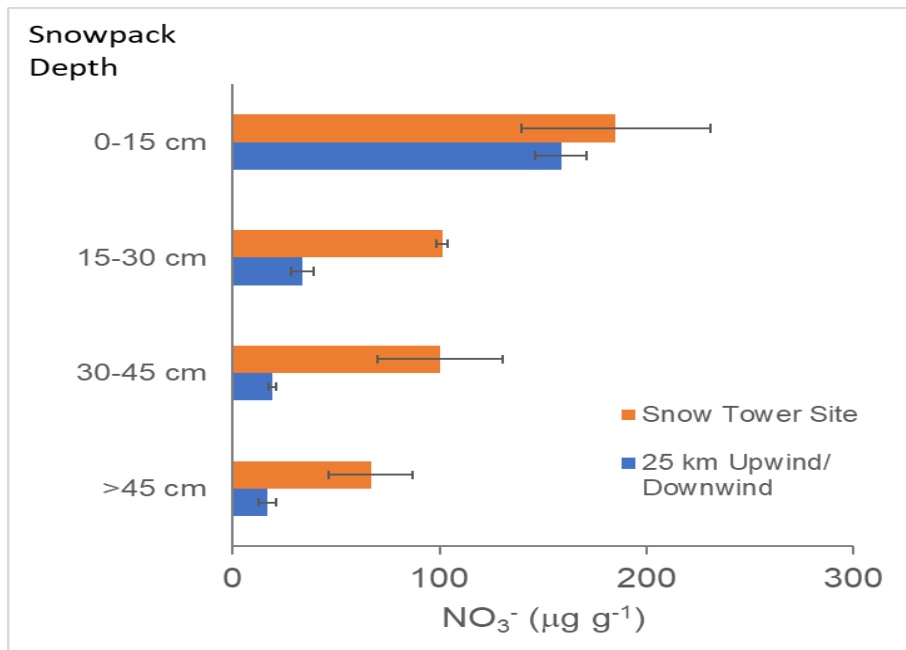

**Supplement Figure S1.** Data from manuscript Figure 9, with the two types of samples (snow pits in proximity ( $\approx 20$  m) to the snow towers (orange), and sampling locations up and downwind of Concordia (blue)) combined and binned in 15 cm depth intervals. Error bars depict the 1- $\sigma$  standard deviation of available data within each bin.

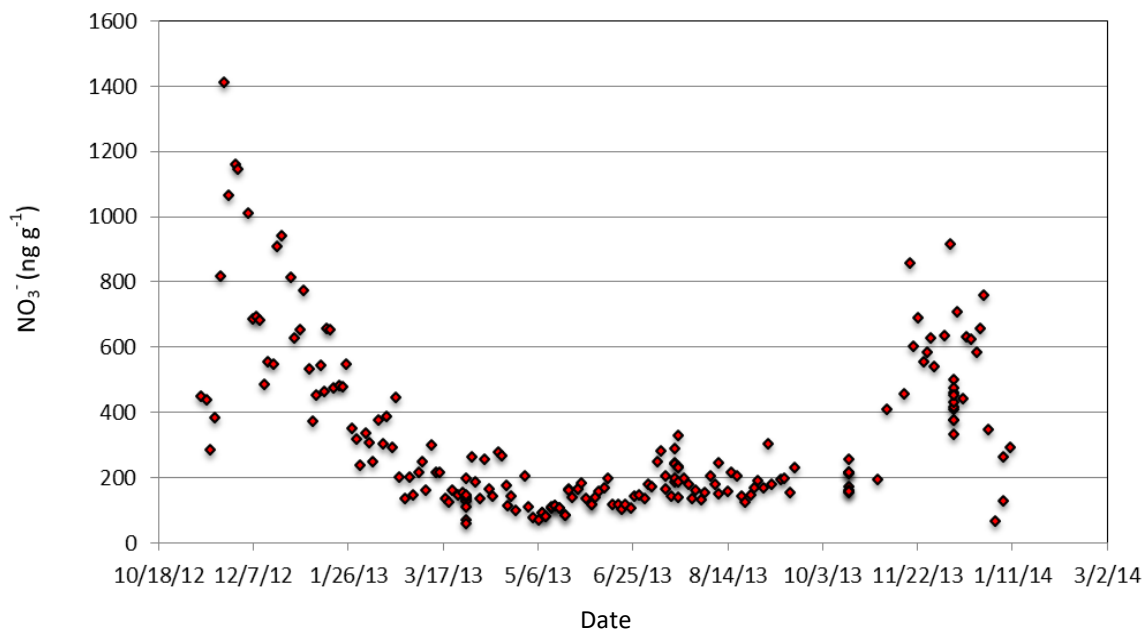

**Supplement Figure S2.** Seasonal cycle of nitrate in skin layer surface snow collected at Dome C three times per week during October 2012 - January 2014.
